# Supplementary material for: Genome-wide association analysis of canine T zone lymphoma identifies link to hypothyroidism and a shared association with mast-cell tumors
Source: BMC Genomics. 2020 Jul 6;21:464. doi: 10.1186/s12864-020-06872-9 (PMC7339439; doi:10.1186/s12864-020-06872-9)
Supplement: Supplementary file 2 — Additional file 2. Summary of snpEff annotations for single nucleotide variants. [file 12864_2020_6872_MOESM2_ESM.xlsx]

## Sheet: Sheet1
Additional File 2. Summary of snpEff annotations for single nucleotide variants.
GeneName	BioType	Approximate gene location	Moderate impact	Missense	Modifier	5' UTR	3' UTR	Upstream gene	Downstream gene	Intron	Non-coding transcript exon	Low impact	Splice region	Synonymous
Chromosome 8
ENSCAFG00000027706	snoRNA	52,401,055-52,401,186	-	-	7	-	-	5	2	-	-	-	-	-
ENSCAFG00000035649	lincRNA	52,843,084-52,872,396	-	-	11	-	-	-	-	11	-	-	-	-
CEP128	Protein coding	52,914,417-53,290,253	-	-	170	-	3	-	11	156	-	-	-	-
ENSCAFG00000039638	lincRNA	53,309,256-53,312,473	-	-	1	-	-	-	-	1	-	-	-	-
GTF2A1	Protein coding	53,519,940-53,564,001	-	-	36	-	2	5	2	27	-	-	-	-
ENSCAFG00000026835	snoRNA	53,551,375-53,551,519	-	-	6	-	-	2	4	-	-	-	-	-
ENSCAFG00000037858	lincRNA	53,566,146-53,579,803	-	-	9	-	-	4	1	4	-	-	-	-
STON2	Protein coding	53,597,941-53,725,688	-	-	127	-	-	1	-	126	-	-	-	-
ENSCAFG00000033948	lincRNA	53,746,557-53,759,679	-	-	21	-	-	4	11	6	-	-	-	-
SEL1L	Protein coding	53,771,761-53,824,492	-	-	211	-	-	16	9	186	-	3	-	3
ENSCAFG00000039987	lincRNA	53,805,971-53,840,850	-	-	119	-	-	23	2	93	1	-	-	-
Chromosome 14
IMPDH1	Protein coding	7,996,893-8,013,287	-	-	1	-	-	-	-	1	-	-	-	-
PRRT4	Protein coding	8,029,236-8,038,095	-	-	1	-	-	-	-	1	-	-	-	-
LEP	Protein coding	8,114,472-8,131,160	-	-	1	-	-	-	1	-	-	-	-	-
ENSCAFG00000036574	lincRNA	8,141,376-8,144,851	-	-	1	-	-	-	1	-	-	-	-	-
ENSCAFG00000032858	lincRNA	8,148,588-8,152,852	-	-	1	-	-	1	-	-	-	-	-	-
ENSCAFG00000034487	lincRNA	8,212,887-8,226,291	-	-	1	-	-	1	-	-	-	-	-	-
SND1	Protein coding	8,260,919-8,685,952	-	-	11	-	-	1	-	10	-	-	-	-
PAX4	Protein coding	8,714,949-8,719,371	-	-	8	-	-	4	4	3	-	-	-	-
FSCN3	Protein coding	8,724,865-8,730,729	-	-	11	-	-	1	6	8	-	-	-	-
ARF5	Protein coding	8,728,365-8,735,331	-	-	13	-	4	3	6	-	-	-	-	-
GCC1	Protein coding	8,738,782-8,742,022	-	-	3	-	-	3	-	-	-	-	-	-
ENSCAFG00000035664	lincRNA	8,779,984-8,787,289	-	-	4	-	-	-	2	1	1	-	-	-
ZNF800	Protein coding	8,866,900-8,884,790	-	-	3	-	-	2	-	1	-	-	-	-
GRM8	Protein coding	8,993,463-9,719,899	-	-	248	-	-	1	2	245	-	1	-	1
cif-mir-592	miRNA	9,182,237-9,182,331	-	-	5	-	-	3	2	-	-	-	-	-
ENSCAFG00000037039	lincRNA	9,988,593-9,989,896	-	-	1	-	-	-	1	-	-	-	-	-
ENSCAFG00000036162	lincRNA	10,190,965-10,354,356	-	-	86	-	-	-	-	86	-	-	-	-
POT1	Protein coding	10,986,871-11,070,651	-	-	4	-	-	-	-	4	-	-	-	-
GPR37	Protein coding	11,114,415-11,132,395	-	-	4	-	-	2	-	2	-	-	-	-
ENSCAFG00000001759	Protein coding	11,350,342-11,351,840	-	-	18	-	-	7	11	-	-	3	-	3
ENSCAFG00000032124	Processed pseudogene	11,447,820-11,448,038	-	-	13	-	-	10	3	-	-	-	-	-
LSM3	Protein coding	11,481,430-11,481,735	-	-	1	-	-	-	1	-	-	-	-	-
TMEM229A	Protein coding	11,646,915-11,648,024	-	-	5	-	-	-	5	-	-	-	-	-
SPAM1	Protein coding	11,703,906-11,723,178	1	1	51	-	3	5	7	36	-	-	-	-
HYAL4	Protein coding	11,736,206-11,743,786	3	3	58	2	1	21	25	11	-	-	-	-
ENSCAFG00000024436	Protein coding	11,760,627-11,770,158	1	1	27	-	-	7	12	8	-	1	-	1
ENSCAFG00000026099	snoRNA	11,780,392-11,780,603	-	-	15	-	-	11	3	-	1	-	-	-
WASL	Protein coding	11,828,687-11,901,682	-	-	102	-	-	13	1	88	-	1	-	1
LMOD2	Protein coding	11,918,483-11,925,130	-	-	23	-	-	6	7	10	-	-	-	-
ASB15	Protein coding	11,931,570-11,958,359	-	-	23	-	-	3	6	14	-	-	-	-
ENSCAFG00000025112	Protein coding	11,995,994-12,008,054	-	-	4	-	-	4	-	-	-	-	-	-
GRM3	Protein coding	12,980,180-13,071,783	-	-	55	-	-	-	-	55	-	1	-	1
KIAA1324L	Protein coding	13,076,932-13,245,320	-	-	16	-	-	-	-	16	-	-	-	-
DMTF1	Protein coding	13,338,261-13,377,136	-	-	25	-	-	4	1	20	-	1	-	1
TMEM243	Protein coding	13,378,676-13,381,317	-	-	4	-	-	1	2	1	-	-	-	-
ENSCAFG00000039543	lincRNA	13,424,493-13,432,523	-	-	2	-	-	1	1	-	-	-	-	-
CROT	Protein coding	13,474,854-13,534,793	1	1	173	-	9	4	21	150	-	2	-	2
ABCB4	Protein coding	13,542,668-13,614,146	-	-	36	-	-	3	3	31	-	1	1	-
MDR1	Protein coding	13,644,042-13,743,053	2	2	138	-	-	-	-	138	-	-	-	-
RUNDC3B	Protein coding	13,803,600-13,930,733	-	-	4	-	-	1	-	3	-	-	-	-
DBF4	Protein coding	13,983,320-14,019,701	-	-	5	-	-	-	1	4	-	-	-	-
ENSCAFG00000038610	lincRNA	13,984,440-13,996,438	-	-	2	-	-	-	-	2	-	-	-	-
ADAM22	Protein coding	14,032,475-14,250,288	-	-	3	-	-	-	-	3	-	1	-	1
SRI	Protein coding	14,260,113-14,275,207	-	-	1	-	-	-	-	1	-	-	-	-
STEAP4	Protein coding	14,319,840-14,345,870	-	-	23	-	-	22	-	1	-	-	-	-
ZNF804B	Protein coding	15,146,202-15,247,064	-	-	1	-	-	-	-	1	-	-	-	-
ENSCAFG00000037438	lincRNA	15,322,541-15,348,896	-	-	93	-	-	-	9	84	-	-	-	-
ENSCAFG00000038636	lincRNA	15,404,763-15,519,171	-	-	19	-	-	-	2	17	-	-	-	-
ENSCAFG00000021475	snRNA	15,626,361-15,626,464	-	-	23	-	-	13	10	-	-	-	-	-
ENSCAFG00000040353	lincRNA	15,711,267-15,714,286	-	-	9	-	-	6	3	-	-	-	-	-
ENSCAFG00000034336	lincRNA	15,948,486-15,996,712	-	-	2	-	-	-	-	2	-	-	-	-
STEAP1	Protein coding	16,074,785-16,088,182	-	-	3	-	-	2	-	1	-	-	-	-
