# Supplementary material for: Genome-wide association analysis of canine T zone lymphoma identifies link to hypothyroidism and a shared association with mast-cell tumors
Source: BMC Genomics. 2020 Jul 6;21:464. doi: 10.1186/s12864-020-06872-9 (PMC7339439; doi:10.1186/s12864-020-06872-9)
Supplement: Supplementary file 4 — Additional file 4. Summary of potential regulatory elements. [file 12864_2020_6872_MOESM4_ESM.xlsx]

## Sheet: Sheet1
Additional File 4. Summary of potential regulatory elements.
Enhancer name	Human location		Gene targets	Variants in location
GH14F080149	chr14	80149793-80152533	DIO2, LOC105370591, LOC105370593	cfa8:52637369C>T, cfa8:52637577C>T, cfa8:52638277ATTC>A, cfa8:52638688T>G, cfa8:52638807T>C, cfa8:52638810C>T, cfa8:52638841T>C, cfa8:52638957G>A, cfa8:52638968T>C, cfa8:52639257T>C, cfa8:52639425T>C
GH14F080490	chr14	80490741-80492445	DIO2, PIR42122, HMGN2P2	cfa8:52908241T>G, cfa8:52909750C>A, cfa8:52909963C>A, cfa8:52910636A>G, cfa8:52910641G>A, cfa8:52910725G>T, cfa8:52910779AGC>A, cfa8:52910782ACTTCTC>A, cfa8:52911069GAATGCTTCA>G, cfa8:52911079A>AGGGGG
GH14F081218	chr14	81218244-81223058	GTF2A1, CEP128, LOC101928504, SNORA79, GC14M081203	cfa8:53562158G>A, cfa8:53564825A>C, cfa8:53569483CTT>CT, cfa8:53569932TAAC>T
GH14F081422	chr14	81422801-81428583	STON2, LOC100506700, DYNLL1P2	cfa8:53721593G>T, cfa8:53724541C>A
GH14F081434	chr14	81434277-81437366	GTF2A1, STON2, LOC100506700, DYNLL1P2	cfa8:53733232T>C, cfa8:53733863C>A, cfa8:53736400T>TA
GH14F081473	chr14	81473257-81475664	GTF2A1, SEL1L, SNORA79, CEP128, LOC100506700	cfa8:53768127C>T, cfa8:53768170ACAAT>A, cfa8:53768224T>C, cfa8:53768739C>T, cfa8:53768749GA>G, cfa8:53769789TA>T
GH14F081516	chr14	81516304-81520717	SEL1L, LOC100506700	cfa8:53808023G>C, cfa8:53812372G>A, cfa8:53812505T>G, cfa8:53812691T>C, cfa8:53812902G>C, cfa8:53812949A>G, cfa8:53812956T>A, cfa8:53812962C>A, cfa8:53813064G>C, cfa8:53813354T>C
GH14F081529	chr14	81529402-81530399	SEL1L, LOC100506700	cfa8:53820166G>A, cfa8:53820327T>C, cfa8:53820384G>A
GH14F081532	chr14	81532659-81536926	GTF2A1, SEL1L, LINC01467	cfa8:53822344T>C, cfa8:53825141G>C, cfa8:53825250G>A, cfa8:53825410G>GT, cfa8:53826199C>T, cfa8:53826369T>TACCC, cfa8:53826727C>T, cfa8:53826790G>A, cfa8:53826797AT>A, cfa8:53826992T>C, cfa8:53827032G>A, cfa8:53827044C>T, cfa8:53827076A>G, cfa8:53827088C>A, cfa8:53827096A>C
