# Supplementary material for: Genome-wide association analysis of canine T zone lymphoma identifies link to hypothyroidism and a shared association with mast-cell tumors
Source: BMC Genomics. 2020 Jul 6;21:464. doi: 10.1186/s12864-020-06872-9 (PMC7339439; doi:10.1186/s12864-020-06872-9)
Supplement: Supplementary file 7 — Additional file 7. SNPs in the chromosome 14 peak from the combined TZL + MCT GWAS. [file 12864_2020_6872_MOESM7_ESM.xlsx]

## Sheet: Sheet1
Additional File 7. SNPs in the chromosome 14 peak from the combined TZL + MCT GWAS.
			Alleles	Associated Allele Freq		R2 from top SNP	TZL + MCT GWAS		Conditional for Chr14
SNP	Chr	BP		TZL	Ref		OR	P-value	OR	P-value
BICF2G630517340	14	2191219	T/G	0.75	0.57	0.564385	1.16279	6.0457e-05	0.980392	0.622151
BICF2G630517370	14	2213041	A/G	0.75	0.57	0.564385	1.16279	6.0457e-05	0.980392	0.622151
BICF2G630517387	14	2224605	T/C	0.75	0.57	0.564385	1.16279	6.0457e-05	0.980392	0.622151
BICF2G630517402	14	2248006	T/C	0.75	0.57	0.565695	1.14943	6.83165e-05	0.980392	0.608018
BICF2G630517422	14	2263592	A/G	0.75	0.57	0.564385	1.16279	6.0457e-05	0.980392	0.622151
BICF2G630517453	14	2291305	G/A	0.75	0.57	0.562452	1.16279	3.7949e-05	0.990099	0.709526
BICF2G630519109	14	4790093	G/A	0.77	0.59	0.52623	1.17647	1.66491e-05	1	0.98358
BICF2G630519137	14	4873671	G/T	0.76	0.59	0.529771	1.16279	5.70593e-05	0.990099	0.741602
BICF2P875875	14	5198586	C/G	0.89	0.75	0.311551	1.19048	5.32062e-05	1.03093	0.451677
BICF2G630519935	14	9007123	C/G	0.77	0.6	0.424512	1.16279	2.04015e-05	1.0101	0.717885
BICF2G630519944	14	9028362	C/T	0.77	0.6	0.423203	1.16279	2.5494e-05	1.0101	0.753555
BICF2G630519947	14	9054201	T/C	0.77	0.6	0.423203	1.16279	2.5494e-05	1.0101	0.753555
BICF2G630519948	14	9061567	C/A	0.77	0.6	0.420931	1.16279	2.27505e-05	1.0101	0.723989
BICF2G630520440	14	9897520	G/A	0.7	0.49	0.660326	1.17647	2.90738e-06	1	0.888919
BICF2G630520475	14	9910392	T/G	0.7	0.49	0.667869	1.17647	6.23449e-06	0.990099	0.731231
BICF2G630520518	14	9930996	G/A	0.7	0.49	0.660326	1.17647	2.90738e-06	1	0.888919
BICF2G630520533	14	9944218	C/T	0.7	0.49	0.665619	1.19048	1.7627e-06	1	0.952406
BICF2G630520585	14	9976888	T/C	0.72	0.53	0.613252	1.17647	6.94916e-06	0.990099	0.843183
BICF2S23335956	14	10450765	C/A	0.62	0.39	0.721162	1.19	9.05428e-07	1	0.911862
BICF2S23442141	14	10462378	G/A	0.63	0.43	0.638656	1.17647	7.81148e-06	0.990099	0.822867
BICF2S2358168	14	10997271	A/G	0.9	0.77	0.272746	1.20482	7.87776e-05	1.04167	0.37531
BICF2P546873	14	11370040	G/A	0.57	0.4	0.574884	1.15	9.29206e-05	0.98	0.51263
BICF2P753712	14	11396405	T/G	0.55	0.35	0.666976	1.18	5.08338e-06	0.99	0.74534
BICF2P1501412	14	11406182	T/G	0.56	0.36	0.674038	1.17	1.10211e-05	0.98	0.580025
BICF2P1022612	14	11425262	G/A	0.55	0.35	0.666976	1.18	5.08338e-06	0.99	0.74534
BICF2P448523	14	11444087	T/C	0.55	0.35	0.666976	1.18	5.08338e-06	0.99	0.74534
BICF2P1199126	14	11451260	T/G	0.55	0.35	0.668936	1.18	6.82664e-06	0.99	0.692917
BICF2G630521558	14	11695969	C/T	0.78	0.59	0.61557	1.19048	1.09058e-06	1	0.948218
BICF2G630521572	14	11721433	T/C	0.7	0.45	0.940861	1.21951	2.79798e-08	0.990099	0.758753
BICF2G630521606	14	11733161	T/C	0.78	0.58	0.606266	1.19048	6.83573e-07	1.0101	0.82093
BICF2G630521619	14	11736615	C/T	0.79	0.58	0.602704	1.19048	5.17288e-07	1.0101	0.772145
BICF2P867665	14	11765081	G/T	0.79	0.57	0.593773	1.21951	1.77166e-08	1.03093	0.359289
TIGRP2P186605	14	11778977	G/A	0.7	0.43	0.954089	1.23457	3.24757e-09	1	0.968129
BICF2G630521678	14	11791385	A/G	0.7	0.44	0.994885	1.23457	2.20513e-09	1	0.963732
BICF2G630521681	14	11794735	C/T	0.7	0.43	1	1.23457	1.51381e-09	1	1
BICF2G630521696	14	11807161	G/A	0.71	0.44	0.984873	1.23457	1.79126e-09	1	0.986308
BICF2P665918	14	11852463	T/C	0.69	0.53	0.375582	1.17647	1.06804e-05	1.02041	0.568634
TIGRP2P186621	14	11867284	A/G	0.69	0.53	0.375582	1.17647	1.06804e-05	1.02041	0.568634
BICF2G630521759	14	11958198	T/C	0.86	0.72	0.291347	1.17647	7.4944e-05	1.03093	0.446934
BICF2P626537	14	12061360	A/G	0.38	0.23	0.302865	1.17	5.19897e-05	1.03	0.444181
BICF2G630522103	14	12249856	C/T	0.39	0.24	0.303355	1.16	8.23021e-05	1.02	0.520343
BICF2G630522165	14	12431638	C/A	0.81	0.63	0.45227	1.21951	3.65376e-07	1.03093	0.355475
BICF2G630522789	14	13423322	C/T	0.59	0.42	0.478408	1.16	7.39316e-05	1	0.88188
SNPs that were significant in the TZL only GWAS are bolded. The top SNP (BICF2G630521681) was the same for both analyses. Ref represents the combined TZUS + control reference group
