# Supplementary material for: Genome-wide association analysis of canine T zone lymphoma identifies link to hypothyroidism and a shared association with mast-cell tumors
Source: BMC Genomics. 2020 Jul 6;21:464. doi: 10.1186/s12864-020-06872-9 (PMC7339439; doi:10.1186/s12864-020-06872-9)
Supplement: Supplementary file 8 — Additional file 8. Antibody panels used for immunophenotyping. [file 12864_2020_6872_MOESM8_ESM.xlsx]

## Sheet: Sheet1
Additional File 8. Antibody panels used for immunophenotyping.
Tube	Antibody specificity and fluorochrome
1	M IgG1-FITC / M IgG1-PE / M IgG1-Alexa 647 / M IgG1-Alexa 700 / M IgG1-PE-750 / M IgG1-Pacific Blue
2	CD3-FITC / CD25-PE / CD5-APC / CD8-Alexa 700 / CD4-Pacific Blue
3	Class II MHC-FITC / CD22-PE / CD21-Alexa 647
4	Class II MHC-FITC / CD34-PE / CD5-APC / CD14-Alexa 750
5	Class II MHC-FITC / CD18-PE / CD5-APC / CD14-Alexa 750 / CD4-Pacific Blue
6	CD5-FITC / CD45-PE / CD21-Alexa 647
*M = mouse
Unless otherwise noted, all antibodies were purchased from AbD Serotec. Clones are as follows: CD45 = YKIX716.13, CD18 = YFC118.3 (human CD18), CD4 = YKIX302.9, CD8 = YCATE 55.9, CD5 = YKIX322.3, CD21 = CA2.1D6, CD22= RFB4 (human CD22, purchased from AbCam), CD3 = CA17.2A12, CD14 = UCHM (human, used in panel 1) and CD14 = TUK4 (human, used in panel 2), class II MHC = YKIX334.2, CD34 = 1H6, CD25 =…
